# Supplementary material for: Stabilization and destabilization of zirconium propoxide precursors by acetylacetoneElectronic supplementary information (ESI) available: summary of 1H NMR spectra and CIF files for compounds 1 and 2. See http://www.rsc.org/suppdata/cc/b4/b406012a/
Source: Royal Society of Chemistry journal article supplement (doi:10.1039/b406012a), 2004-01-01
Supplement: b406012a.doc [file b406012a.doc]

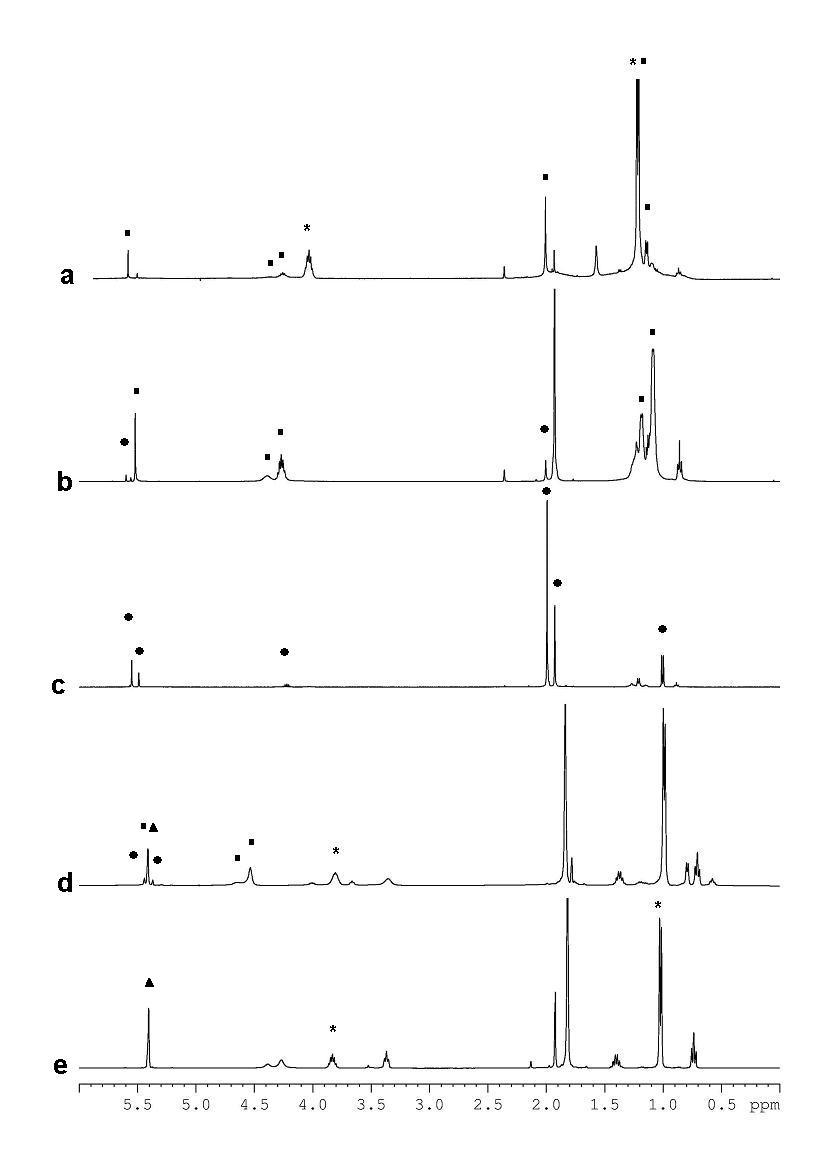


The proton NMR spectra (a) and (b) are zirconium isopropoxide with 0.5 and 1 mol equivalent of acetylacetone. Spectra (c) was obtained from Zr(OiPr)(acac)3 crystals. Mixed ligand precursor after 15 minutes (d) and 16 hours (e) after addition of 2 mol equivalent mol acetylacetone.

The signals corresponding to Zr(OiPr)3(acac) are marked with (
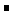
), to Zr(OiPr)(acac)3 – with (
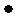
), and to Zr(OiPr)3(iPrOH) – with (
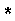
), Zr(acac)4 – with (
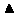
).
